# Supplementary material for: Translational Frameshifting in the chlD Gene Gives a Clue to the Coevolution of the Chlorophyll and Cobalamin Biosyntheses
Source: MDPI journal article supplement (doi:10.3390/microorganisms10061200), 2022-06-11
Supplement: s1 [file s1]

# Translational frameshifting in the *chlD* gene gives a clue to the co-evolution of the chlorophyll and cobalamin biosyntheses

Stepan Kuznetsov<sup>1</sup>, Alexander Milenkin<sup>1</sup> and Ivan Antonov<sup>2,3,\*</sup> 

<sup>1</sup> Moscow Institute of Physics and Technology, Dolgoprudny, Moscow Region, Russia

<sup>2</sup> Institute of Bioengineering, Research Center of Biotechnology, Russian Academy of Science, Moscow, Russia;

<sup>3</sup> Laboratory of Bioinformatics, Faculty of Computer Science, National Research University Higher School of Economics, Moscow, Russia

## Supplementary Figures

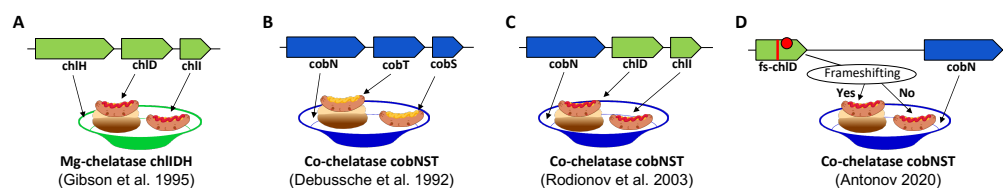

**Supplementary Figure S1.** The main strategies utilized by different prokaryotic species to encode Mg- and Co-chelatases. For visualization purposes, a chelatase is depicted as a sausage (small subunit) and a hot dog (medium subunit) on a plate (large subunit). This representation highlights the fact that each of the chelatases consists of three different subunits and that the small subunit is similar to the N-terminal part of the medium subunit (in other words "a sausage is a part of a hot dog").

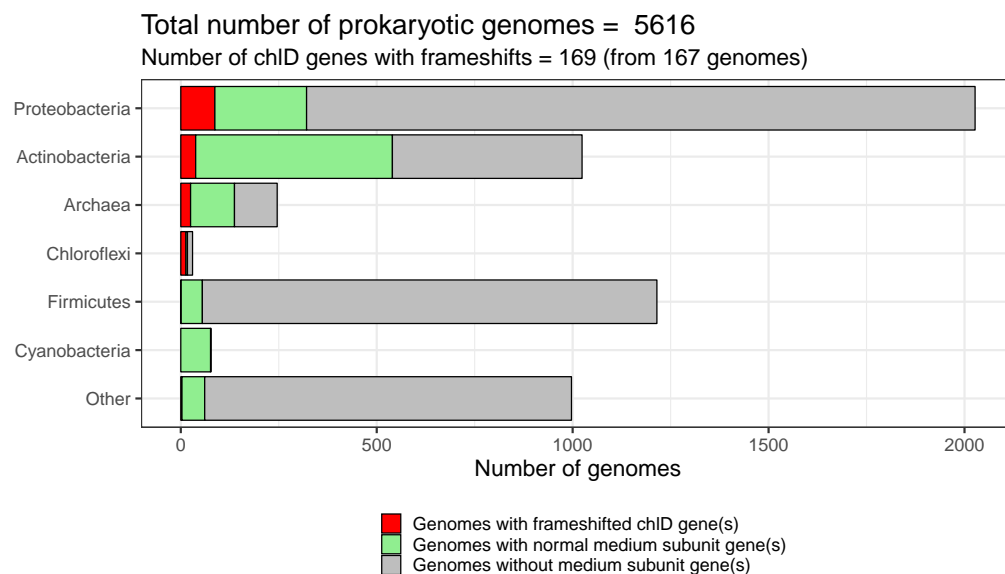

**Supplementary Figure S2.** The number of the identified chID genes in the genomes from different prokaryotic phyla. In each group the fraction of the chID genes with predicted -1 and +1 frameshift is indicated by the red and green colors, respectively.

Total number of genes in the tree = 286

Number of fs-chlD genes = 169

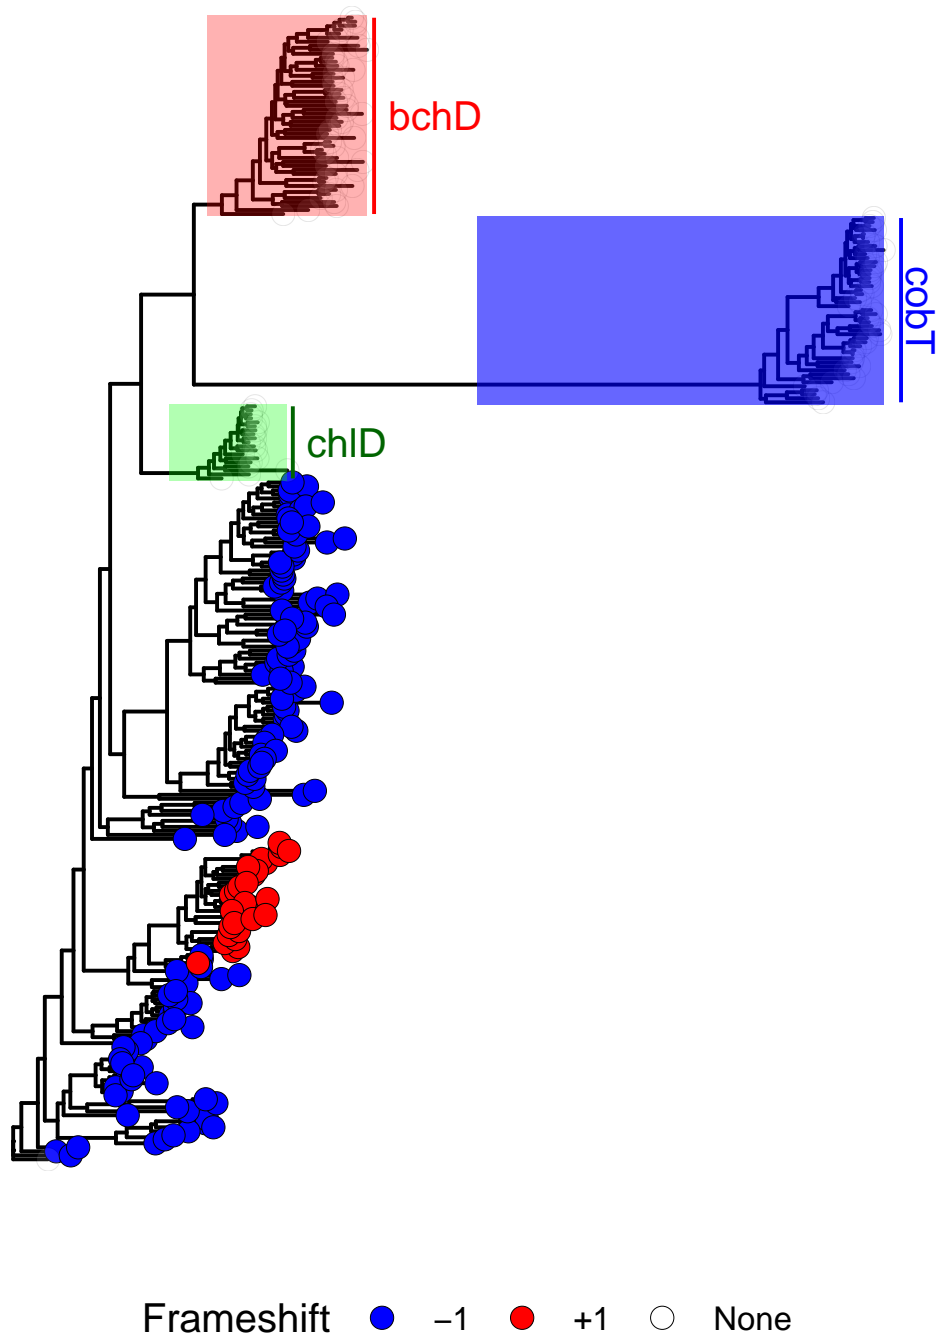

**Supplementary Figure S3.** The reference phylogenetic tree of the annotated medium chelataze subunit proteins and as well as the long products of the fs-chlD genes. The only annotated archaeal bchD gene (METFOR\_RS04410 from *Methanoregula formica* SMSP) was used as the outgroup. The -1 and +1 frameshift types in the fs-chlD genes are indicated by the blue and red colors, respectively.

**A**

NC\_017583.1:1673962:-1

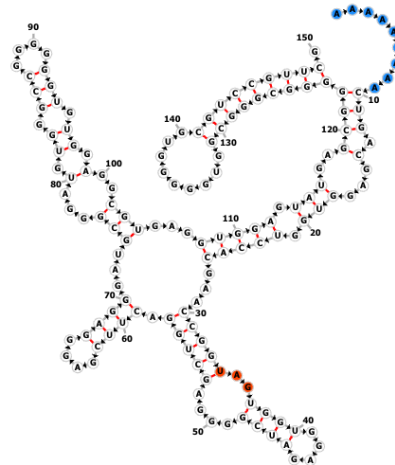**B**

NZ\_LT859958.1:191466:-1

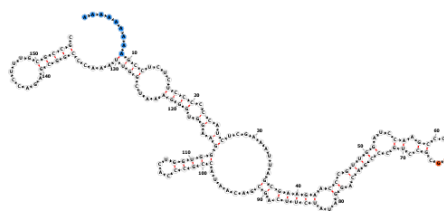

**Supplementary Figure S4.** Frameshifting signals identified in the *fs-chlD* genes from *Spirochaeta thermophila* DSM 6578 (A) and *Brevifilum fermentans* (B). The slippery site of the signal and the in-frame stop codon are marked by the blue and red colors, respectively. The coordinates of the predicted -1 frameshifts are NC\_017583.1:1673962 and NZ\_LT859958.1:191466.

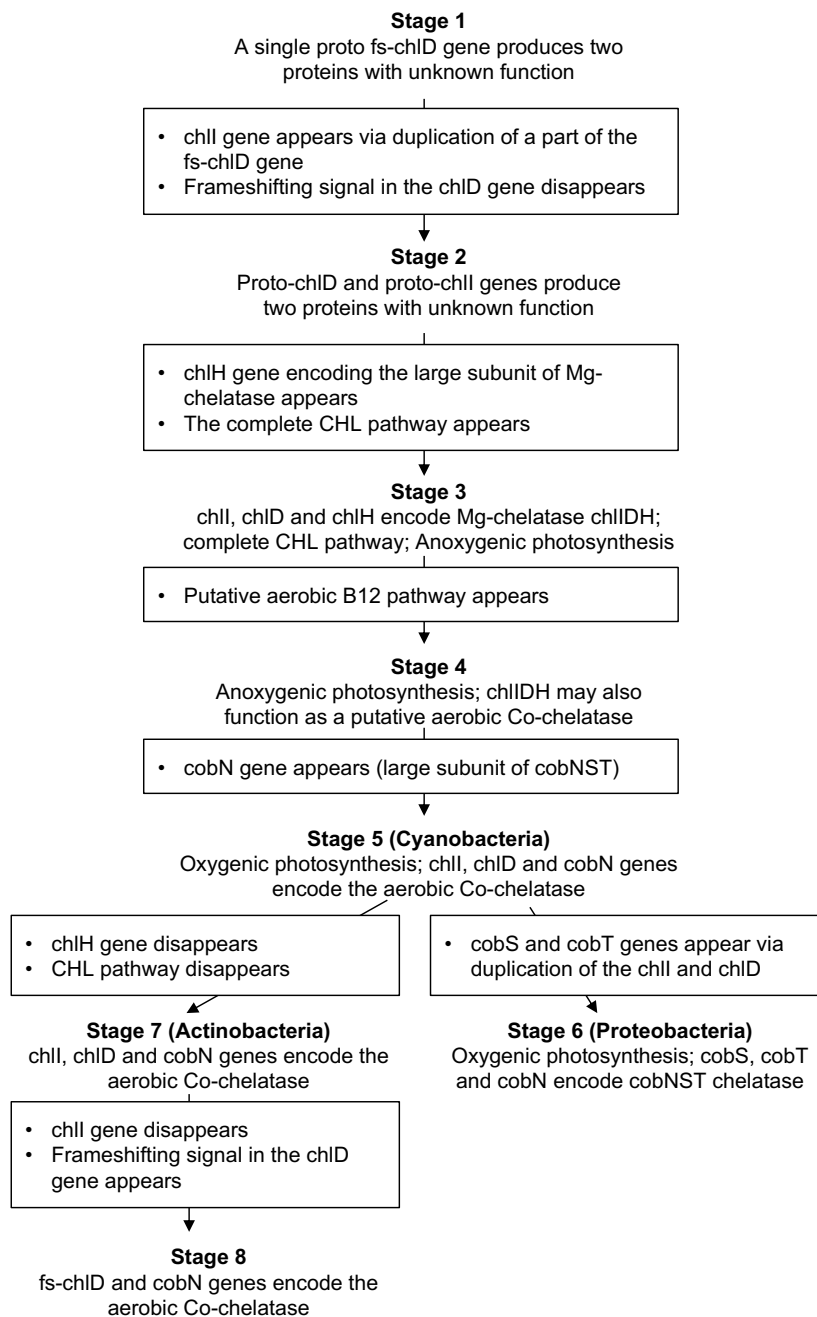

**Supplementary Figure S5.** A putative chain of events that could happen between different stages during the evolution of the CHL and aerobic B12 pathways.
